# Supplementary material for: Nonsteroidal anti-inflammatory drug monitoring in serum: a Tb-MOF-based luminescent mixed matrix membrane detector with high sensitivity and reliability
Source: Royal Society of Chemistry journal article supplement (doi:10.1039/d2dt03426c), 2022-12-12
Supplement: d2dt03426c1.pdf [file d2dt03426c1.pdf]

## Supporting Information

# Nonsteroidal Anti-inflammatory Drugs Monitor in Serum: a Tb-MOFs based Luminescent Mixed Matrix Membranes Detector with High Sensibility and Reliability

*Xiao Lian*<sup>‡ a,d</sup>, *Lele Cheng*<sup>‡ a</sup>, *Jingrui Shan*<sup>a</sup>, *Mingzai Wu*<sup>b</sup>, *Fangcai Zheng*<sup>c</sup>, *He-Lin*

*Niu*<sup>a\*</sup>

<sup>a</sup> Anhui Province Key Laboratory of Chemistry for Inorganic/Organic Hybrid  
Functionalized Materials, Key Laboratory of Functional Inorganic Materials of Anhui  
Province, Department of Chemistry, Anhui University, Hefei 230601, P. R. China

<sup>b</sup> Energy Materials and Devices Key Lab of Anhui Province for Photoelectric  
Conversion, School of Physics and Materials Science, Anhui University, Hefei  
230039, P. R. China

<sup>c</sup> Key Laboratory of Structure and Functional Regulation of Hybrid Materials of  
Ministry of Education, Institutes of Physical Science and Information Technology,  
Anhui University, Hefei 230601, P. R. China

<sup>d</sup> Anhui Province Key Laboratory of Environment-friendly Polymer Materials, Anhui  
University, Hefei 230601, P. R. China

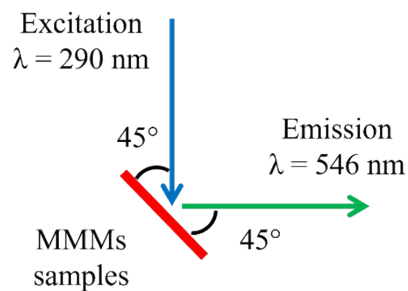

**Figure S1.** Schematic diagram of the light path in the luminescence experiments.

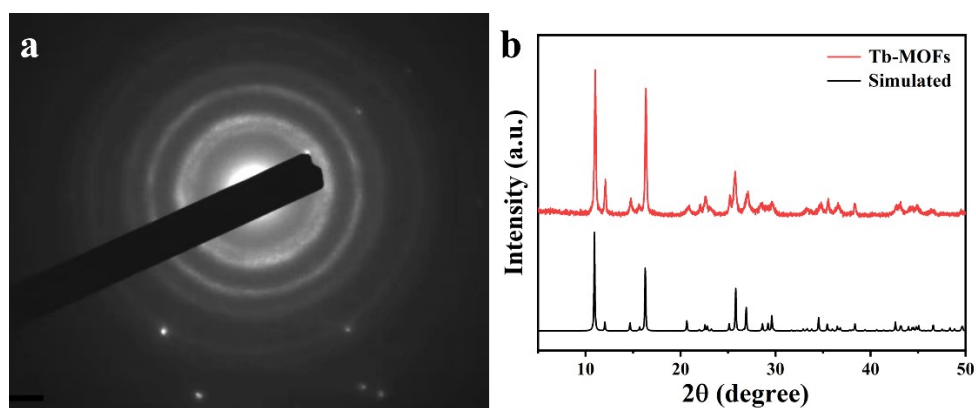

**Figure S2.** (a) Electron diffraction pattern of Tb-MOFs; (b) XRD pattern of Tb-MOFs.

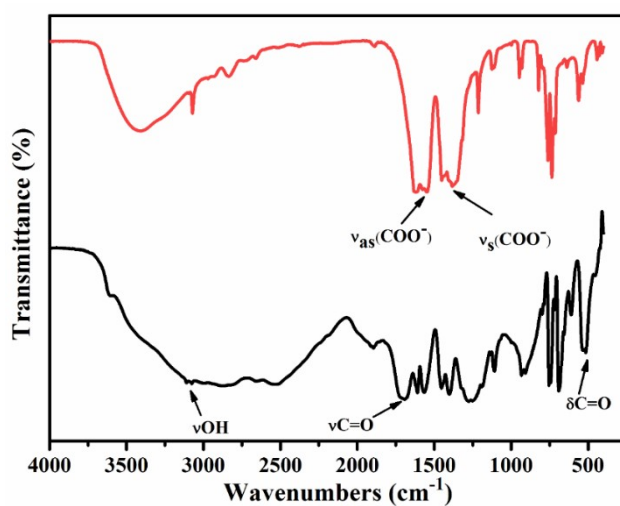

**Figure S3.** FT-IR of BTC (Blank) and ultrasonically prepared MOF (Red).

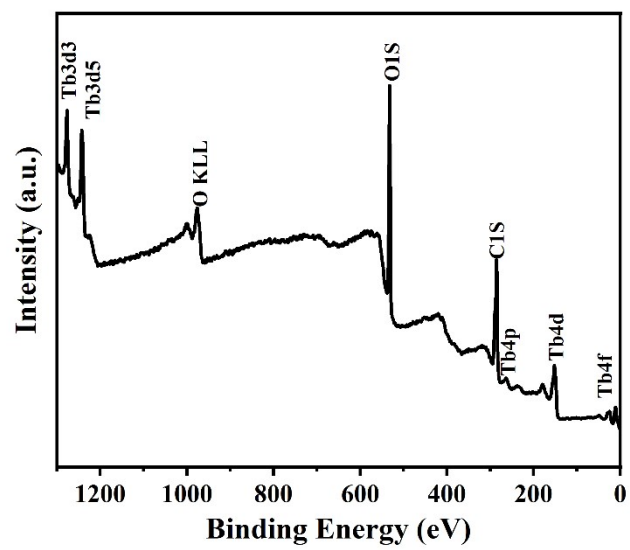

**Figure S4.** XPS spectrum of Tb-MOFs.

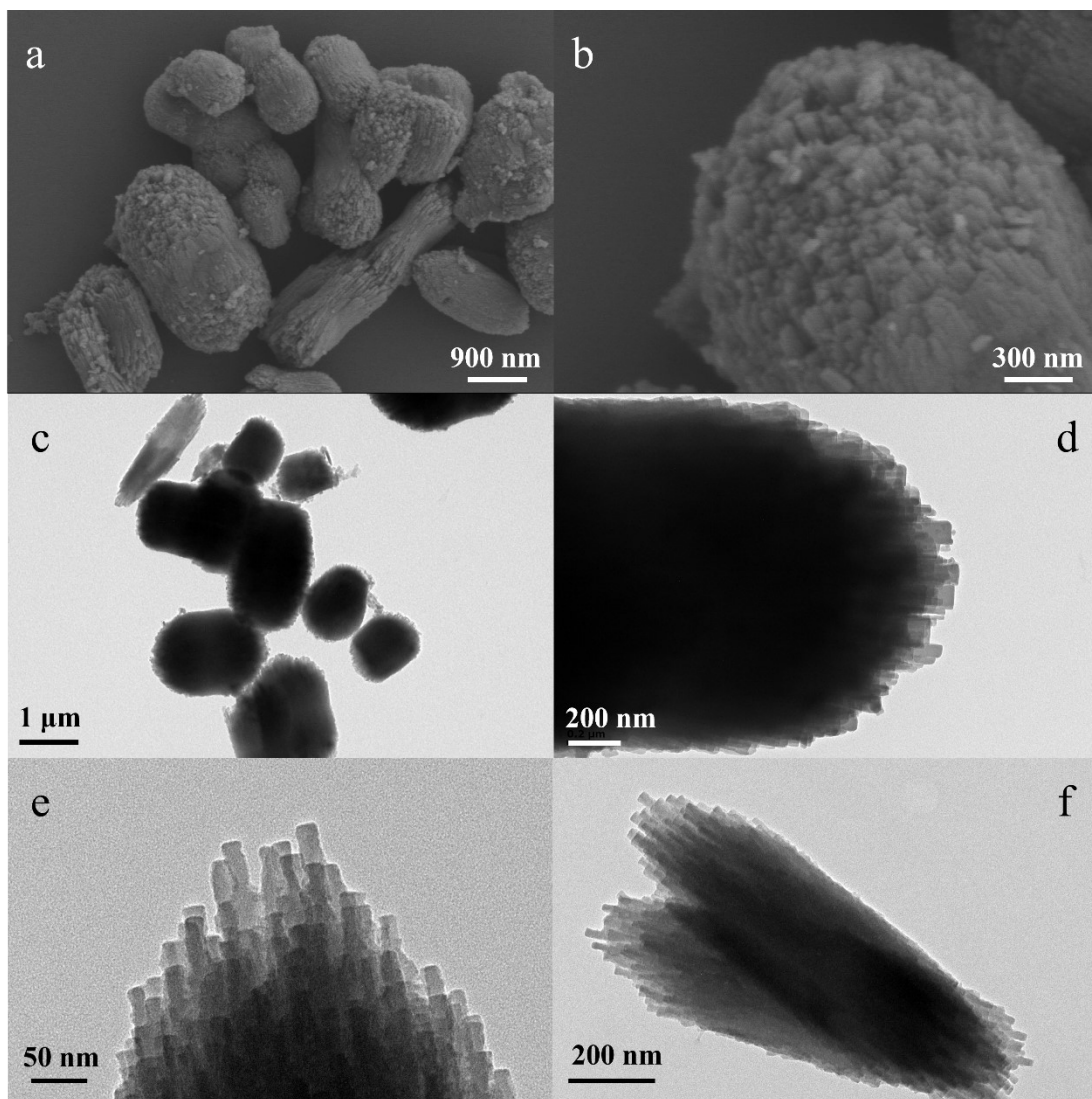

**Figure S5.** (a-b) SEM images of the prepared Tb-MOFs, (c-f) TEM images of the prepared Tb-MOFs.

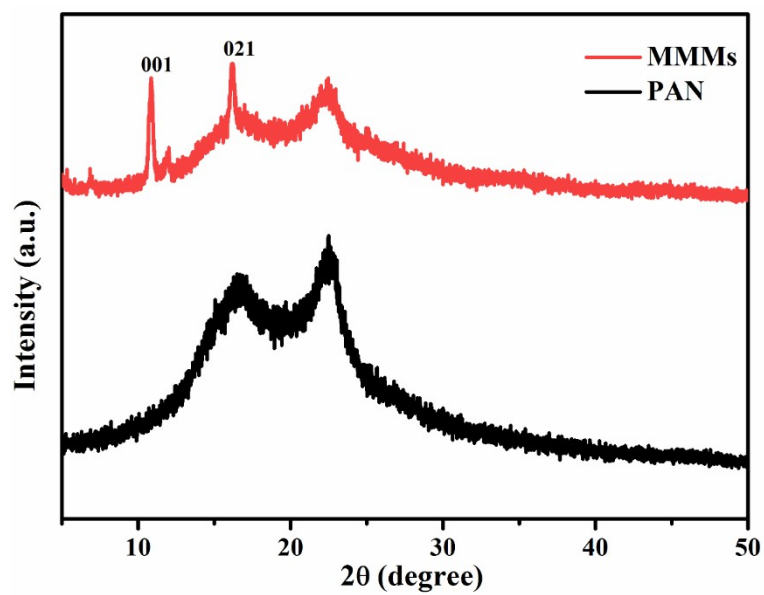

**Figure S6.** XRD patterns of PAN nanofiber membranes and MMMs.

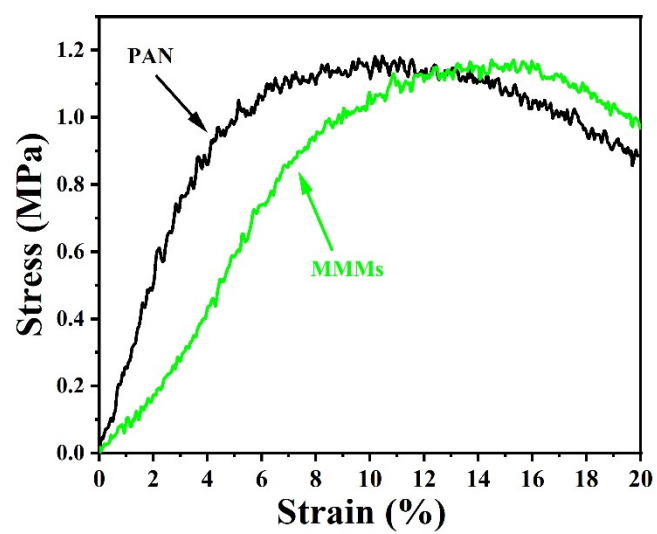

**Figure S7.** Tensile stress-strain curves of PAN nanofiber membranes and MMMs.

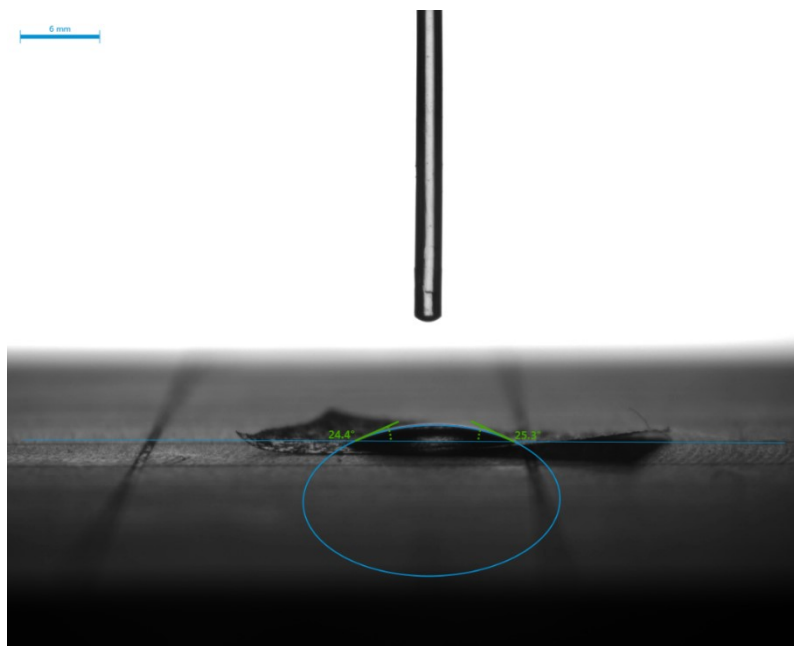

**Figure S8.** The picture of static contact angle test between water and MMMs.

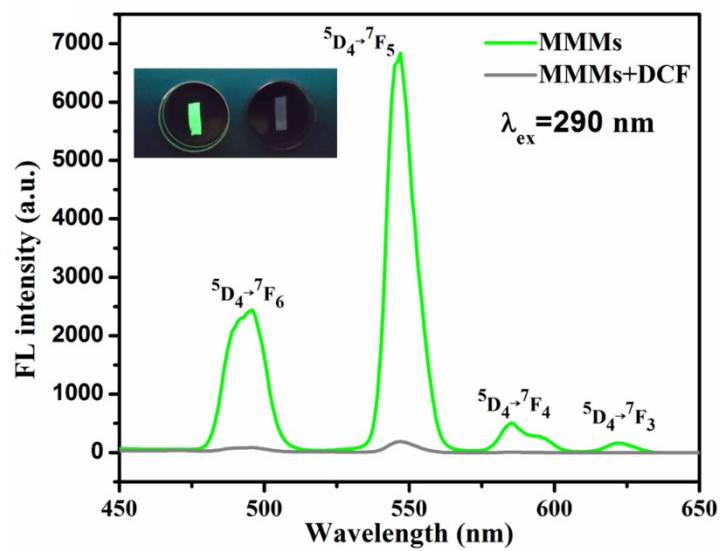

**Figure S9.** Emission spectra of Tb-MOFs without (green) or with (gray) DCF; the photograph of Tb-MOFs under UV radiation without or with DCF (insert).

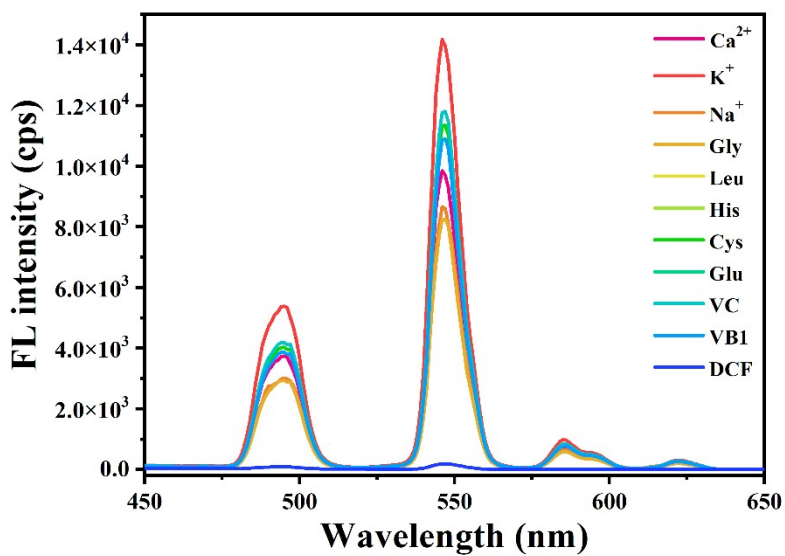

**Figure S10.** Emission spectra of Tb-MOFs in the solution of various chemicals.

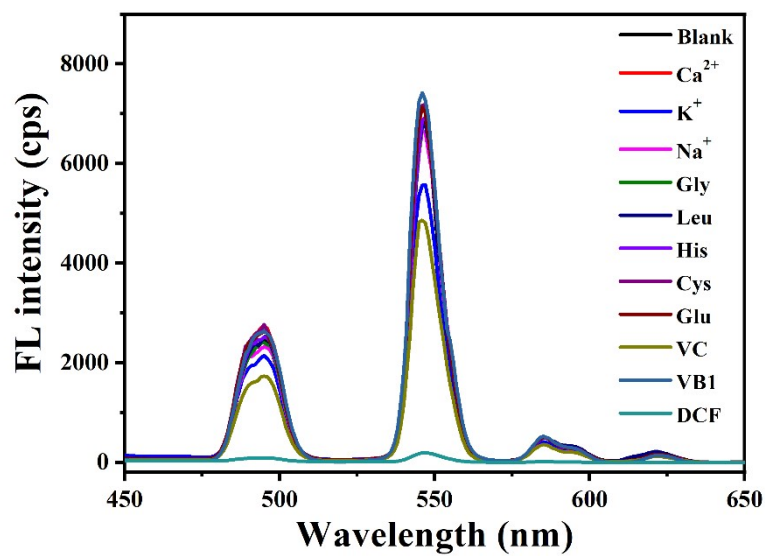

**Figure S11.** Emission spectra of MMMs in the solution of various chemicals.

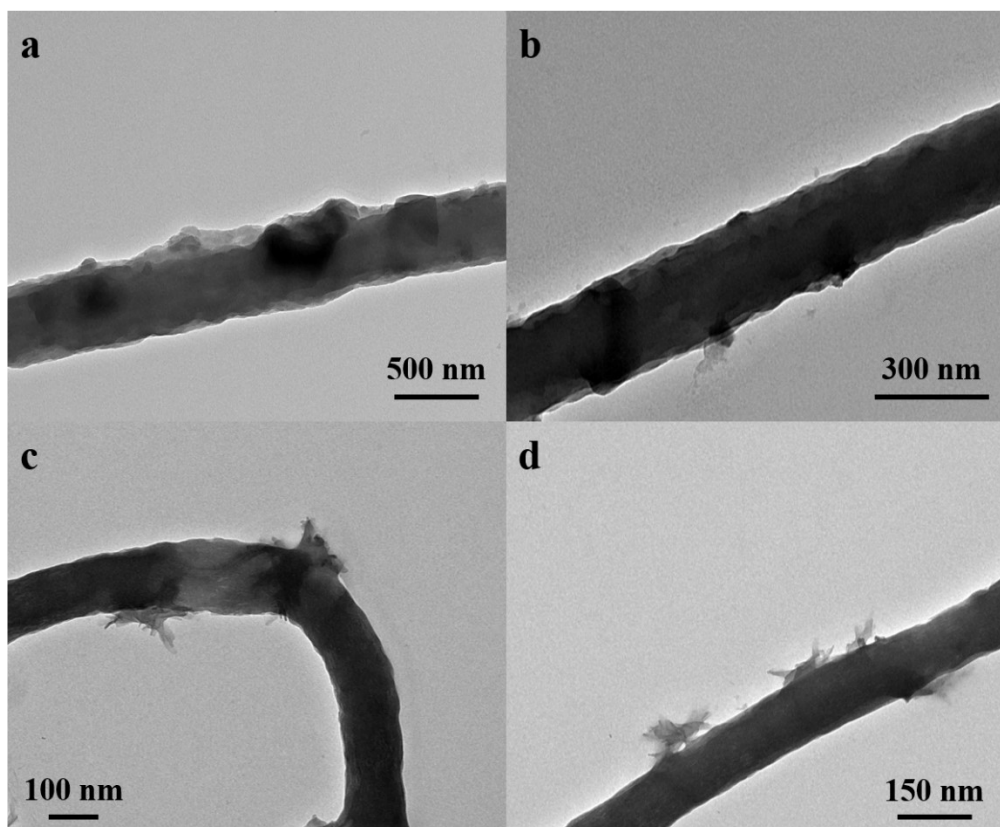

**Figure S12.** TEM images of electrospun nanofibers in the MMMs with different sizes: (a) 500 nm; (b) 200 nm; (c-d) <150 nm.

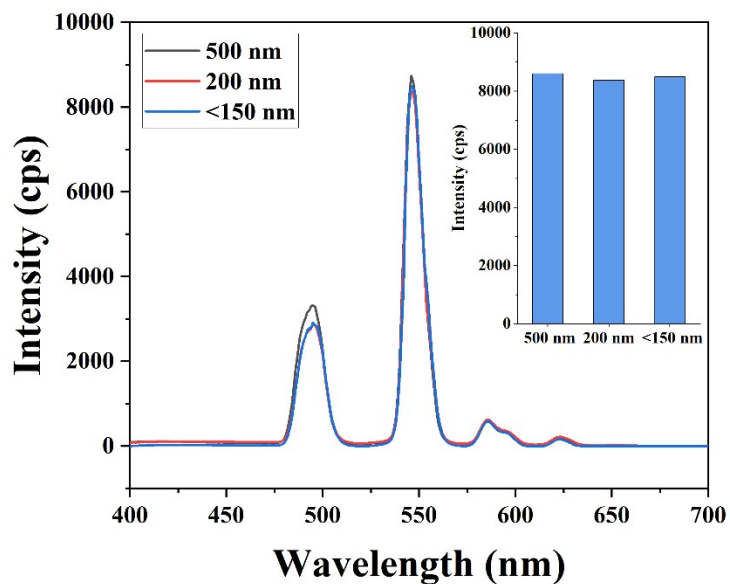

**Figure S13.** Emission spectra (insert: luminescent intensity) of MMMs with various diameters of nanofibers.



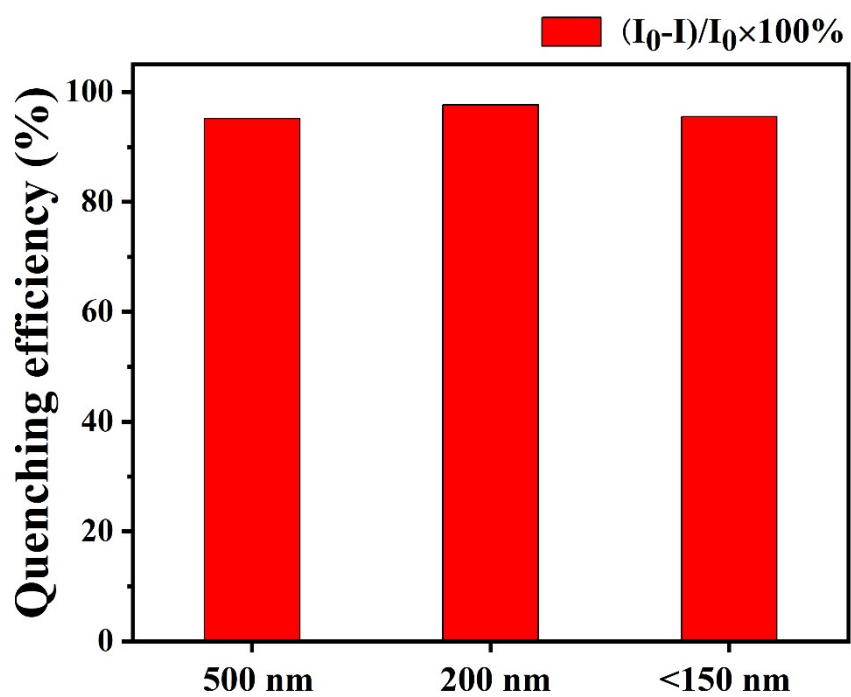

**Figure S14.** Quenching experiment of the MMMs with various diameters of nanofibers.

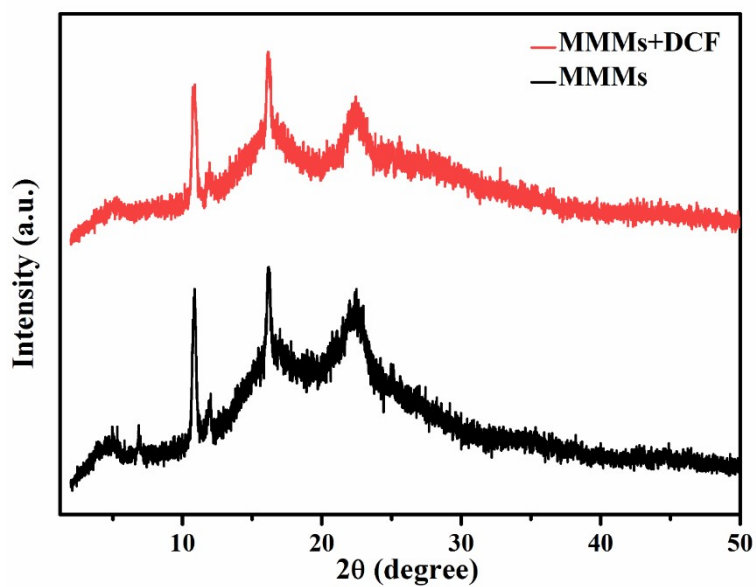

**Figure S15.** XRD patterns of MMMs before and after quenching.

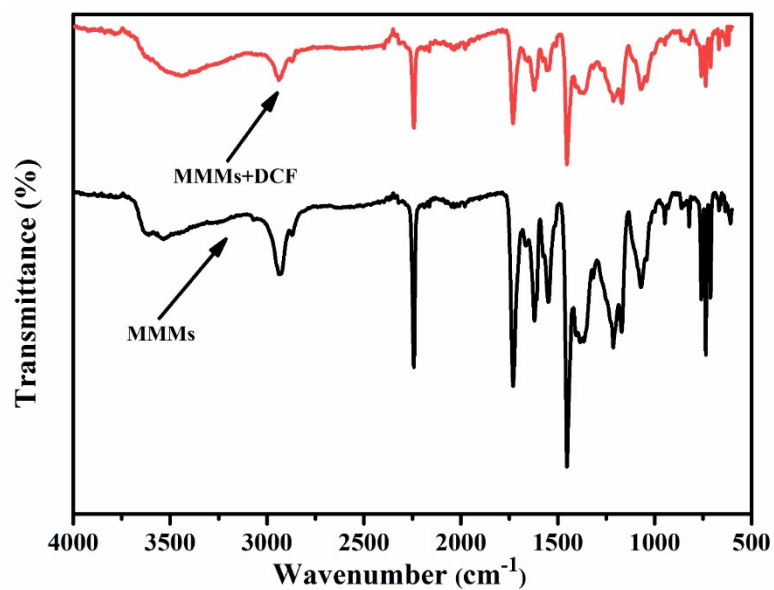

**Figure S16.** FT-IR spectra of MMMs before and after quenching.

**Table S1.** Soak MMMs in diclofenac sodium solution for 12 hours, the content of Tb element in the solution.

| Samples  | Tb content                |
|----------|---------------------------|
| Blank    | Not detected              |
| Solution | $6.1 \times 10^{-10}$ g/l |

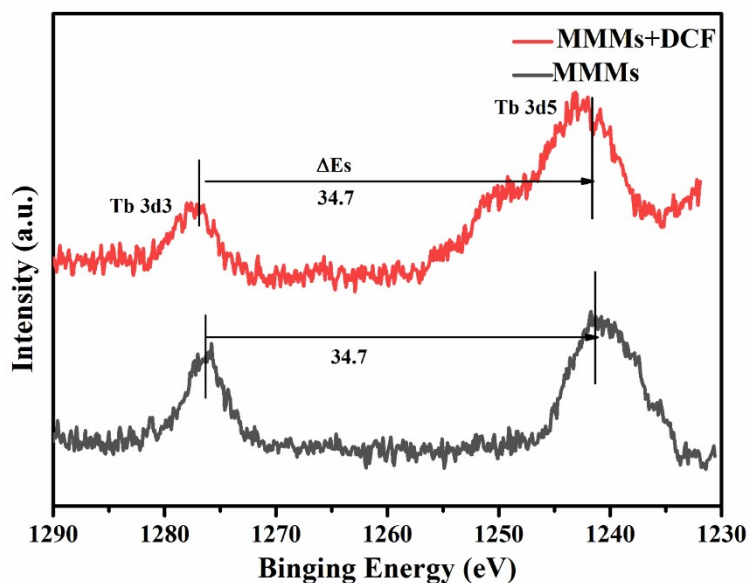

**Figure S17.** Tb 3d electron XPS spectra of MMMs before and after quenching.

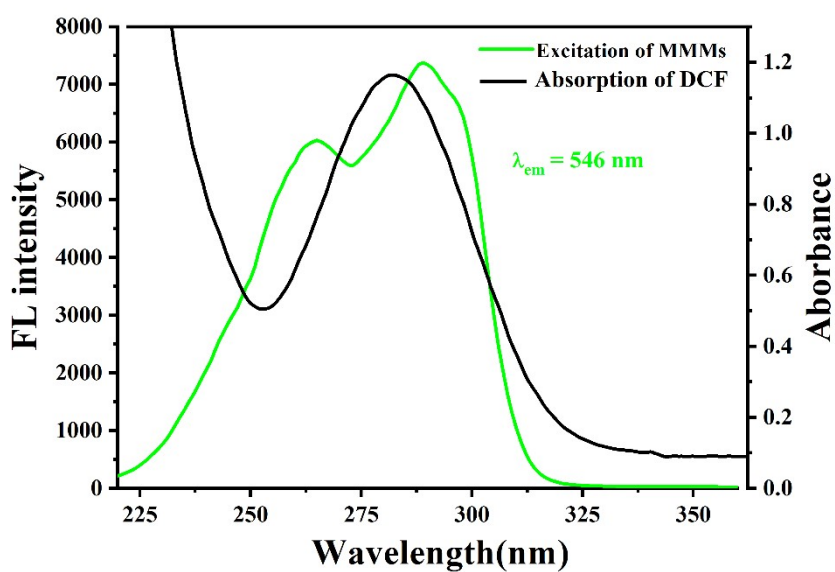

**Figure S18.** Excitation spectrum of MMMs (green,  $\lambda_{em} = 546$  nm) and UV absorption spectrum (black) of DCF.

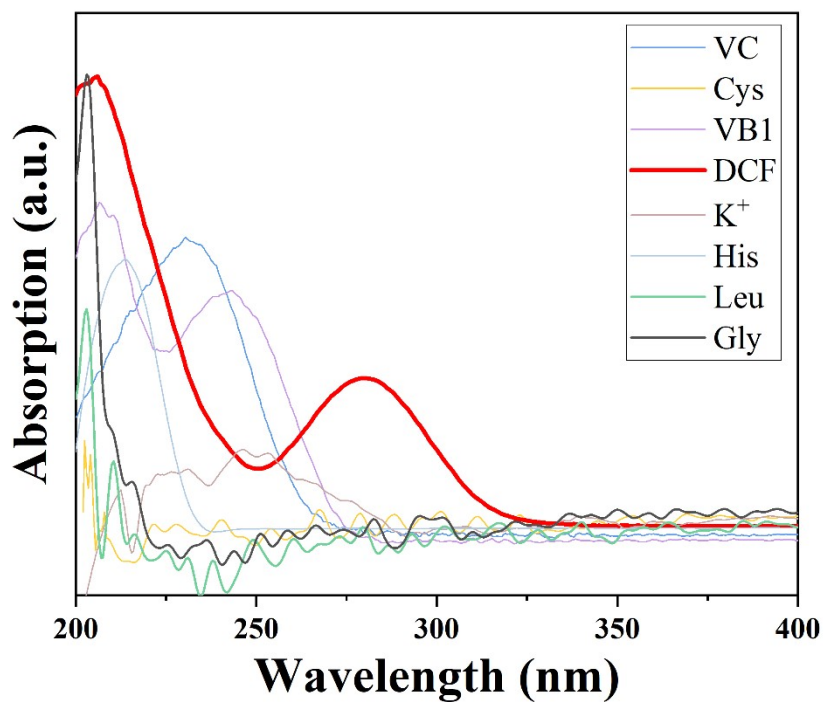

**Figure S19.** Ultraviolet absorption of different substances.

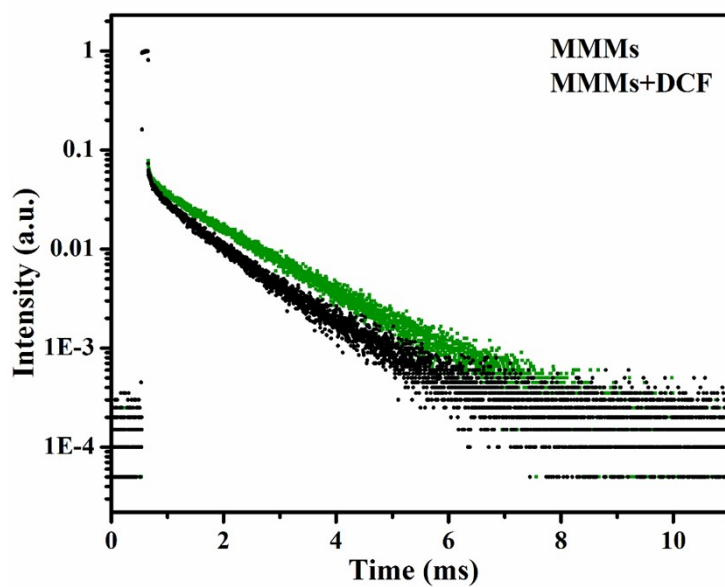

**Figure S20.** Fluorescence lifetime decay curves of MMMs before and after detection of DCF.

**Table S2.** Fluorescence lifetime of MMMs before and after detection of DCF.

| Sample | Lifetime   |
|--------|------------|
| Before | 77 $\mu$ s |
| After  | 52 $\mu$ s |

**Table S3.** The calculation results of singlet and triplet energy levels of H<sub>3</sub>BTC and DCF molecules.

| Molecules          | S <sub>1</sub> level (e.v.) | T <sub>1</sub> level (e.v.) |
|--------------------|-----------------------------|-----------------------------|
| H <sub>3</sub> BTC | 5.0919                      | 4.5850                      |
| DCF                | 4.7106                      | 4.5628                      |

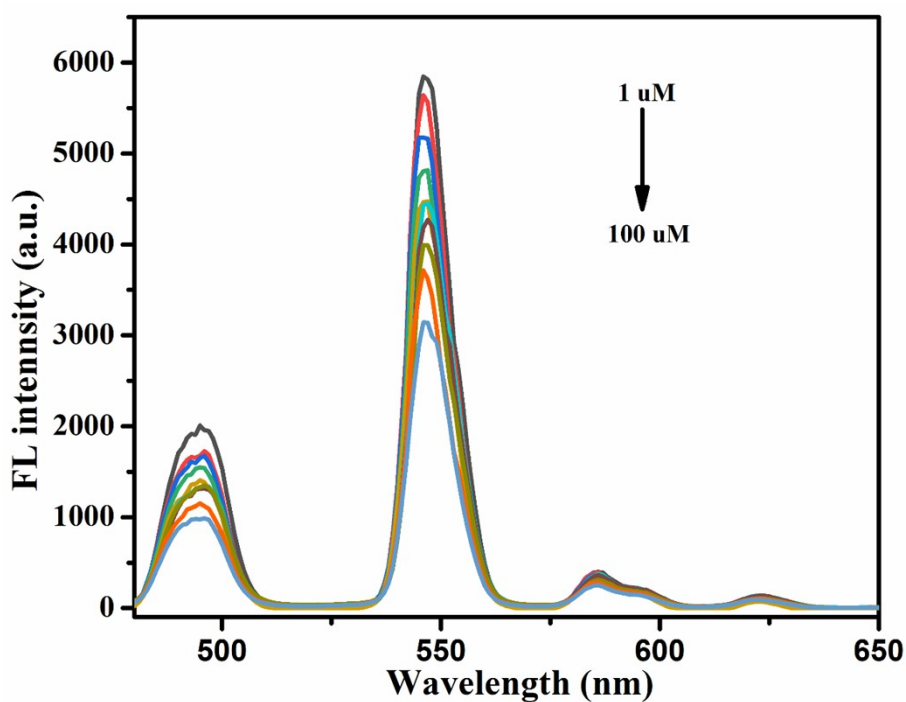

**Figure S21.** Fluorescence emission spectra of MMMs in DCF solutions with different concentrations.

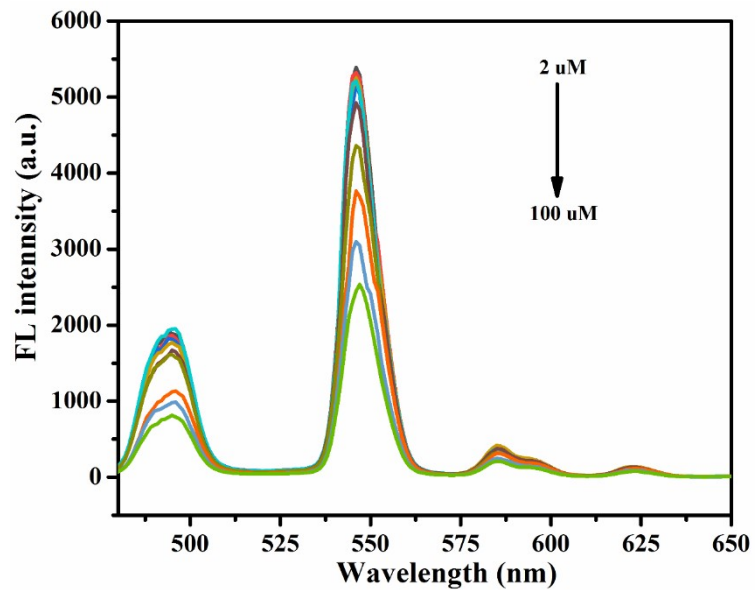

**Figure S22.** Fluorescence emission spectra of MMMs in serum containing DCF with different concentrations.

**Table S4.** Determination of DCF in pig serum.

| Sample | Amount added<br>( $10^{-6}$ M) | Amount found<br>( $10^{-6}$ M) | Recovery (%) | RSD (%)<br>(n=3) |
|--------|--------------------------------|--------------------------------|--------------|------------------|
| 1      | 5                              | $4.97 \pm 0.45$                | 99.4         | 9.05             |
| 2      | 20                             | $19.38 \pm 0.21$               | 96.9         | 1.08             |
| 3      | 40                             | $40.44 \pm 0.24$               | 10.11        | 0.59             |

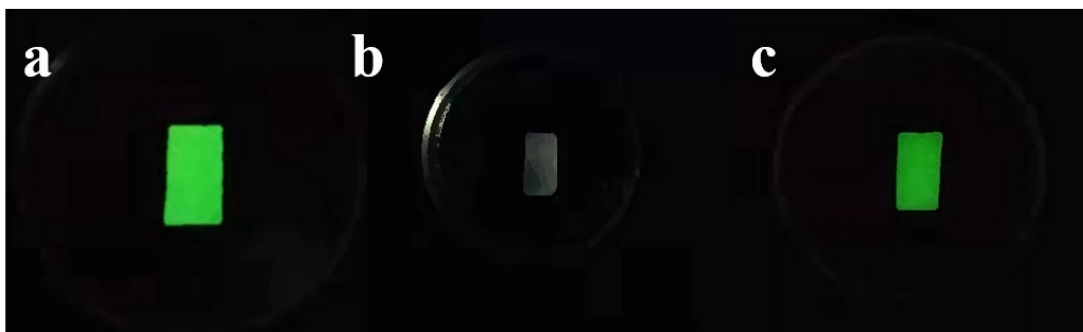

**Figure S23.** (a) MMMs after detecting DCF; (b) MMMs before detecting DCF; (c) MMMs before detecting DCF and washed with deionized water.

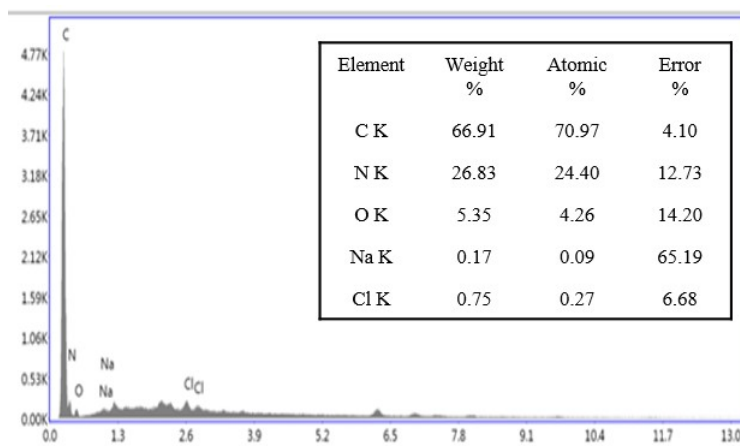

**Figure S24.** EDS spectrum of MMMs quenched and cleaned again (Inset: Analysis of crystal element content).

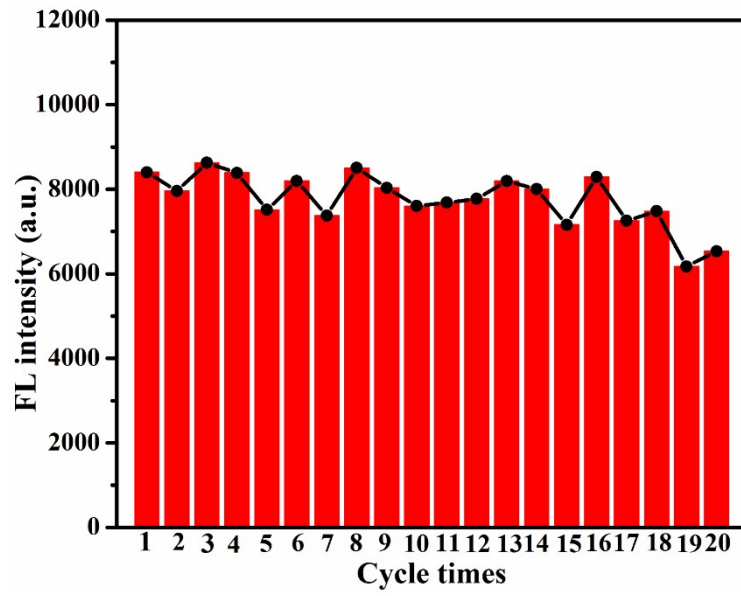

**Figure S25.** The repeated determination of DCF in serum using the as-prepared MMMs.
